# Supplementary material for: Ionic liquid-assisted growth of high-quality methylammonium lead bromide single crystals for photodetection applications
Source: Royal Society of Chemistry journal article supplement (doi:10.1039/d3tc04511k), 2024-01-01
Supplement: d3tc04511k1.pdf [file d3tc04511k1.pdf]

## Supplementary Information

### **Ionic liquid assisted high quality MAPbBr<sub>3</sub> Single Crystal growth for Photodetection Application**

*Apurba Mahapatra,<sup>a</sup> Vishnu Anilkumar,<sup>a</sup> Joanna Kruszyńska,<sup>a</sup> Nada Mrkyvkova,<sup>b,c</sup> Peter Siffalovic,<sup>b,c</sup> Pankaj Yadav<sup>d,e</sup> and Daniel Prochowicz<sup>a,\*</sup>*

<sup>a</sup> Institute of Physical Chemistry, Polish Academy of Sciences, Kasprzaka 44/52, 01-224 Warsaw, Poland

<sup>b</sup> Institute of Physics, Slovak Academy of Sciences, Dubravska cesta 9, 84511 Bratislava, Slovakia.

<sup>d</sup> Center for Advanced Materials and Applications, Slovak Academy of Sciences, Dubravska cesta 9, 84511 Bratislava, Slovakia.

<sup>d</sup> Department of Solar Energy, School of Energy Technology, Pandit Deendayal Energy University, Gandhinagar-382 007, Gujarat, India.

<sup>e</sup> Department of Physics, School of Energy Technology, Pandit Deendayal Energy University, Gandhinagar-382 007, Gujarat, India.

**Corresponding author:** [dprochowicz@ichf.edu.pl](mailto:dprochowicz@ichf.edu.pl)

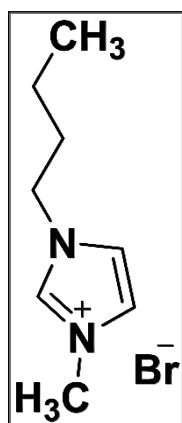

**Figure S1.** Molecular structure of BMIB IL.

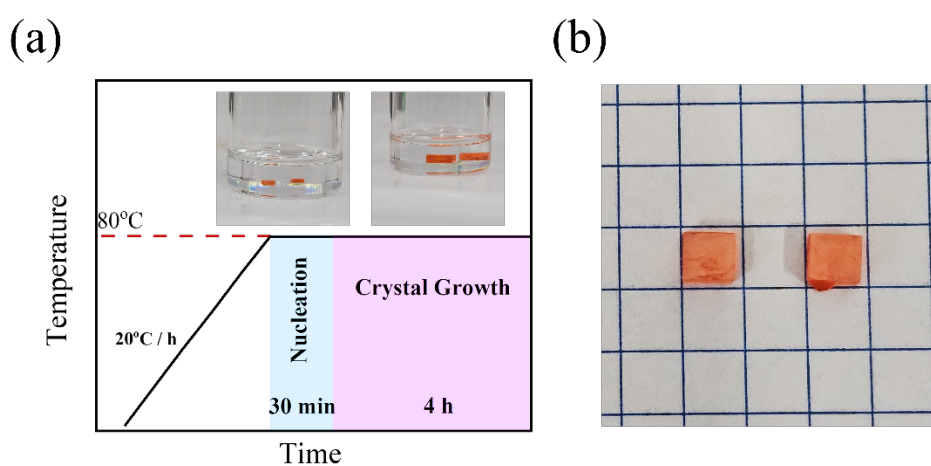

**Figure S2.** (a) Schematic representation of crystallization rate over time for MAPbBr<sub>3</sub> SCs using ITC method at 80°C. (b) Image of as-grown MAPbBr<sub>3</sub> SCs.

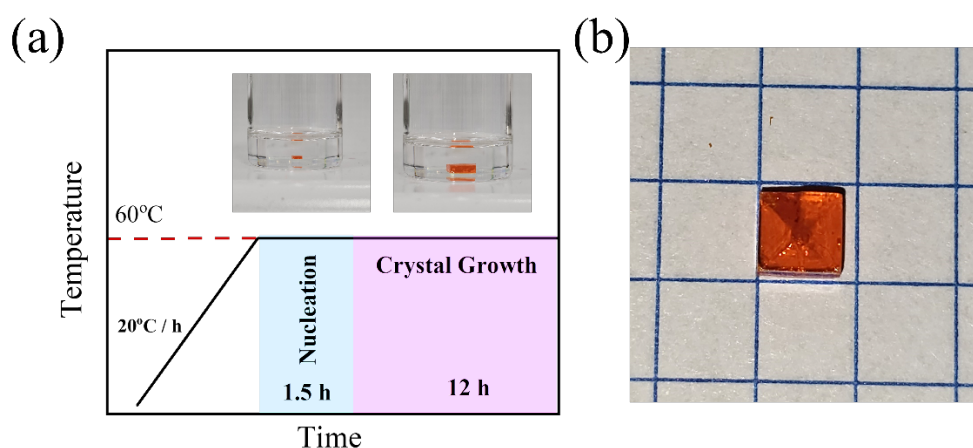

**Figure S3.** (a) Schematic representation of crystallization rate over time for MAPbBr<sub>3</sub> SCs using ITC method at 80°C. (b) Image of as-grown MAPbBr<sub>3</sub> SC in the presence of BMIB (5 %mol).

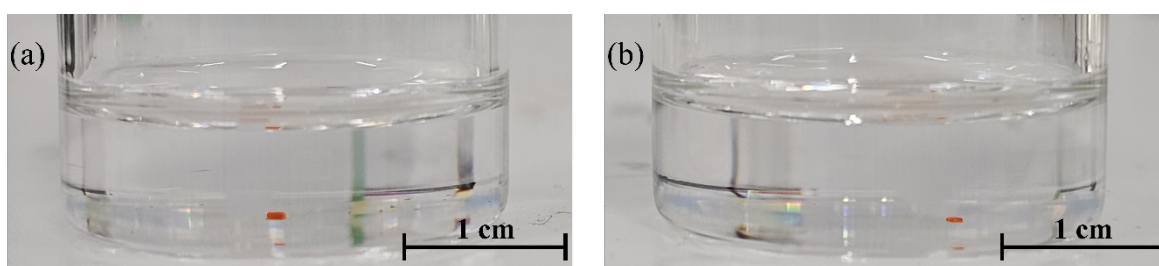

**Figure S4.** Photographs of MAPbBr<sub>3</sub> solution heated at 60°C for 12 h with (a) 1 mol% and (b) 3 mol% BMIB IL.

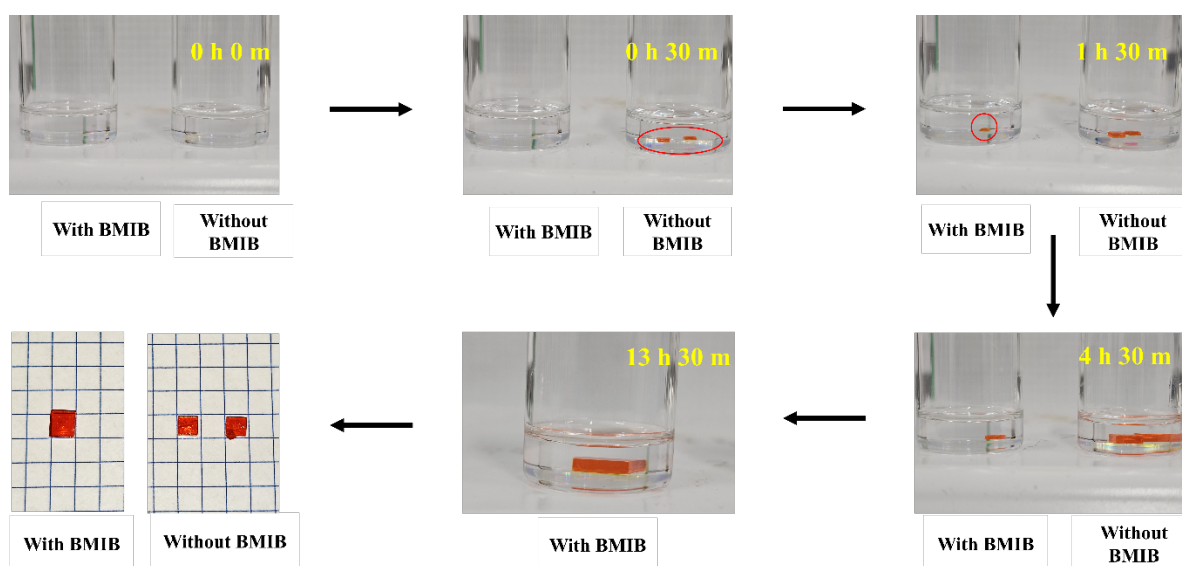

**Figure S5.** Image of crystallization process without and with 5 mol% BMIB IL at 80°C as a function of time.

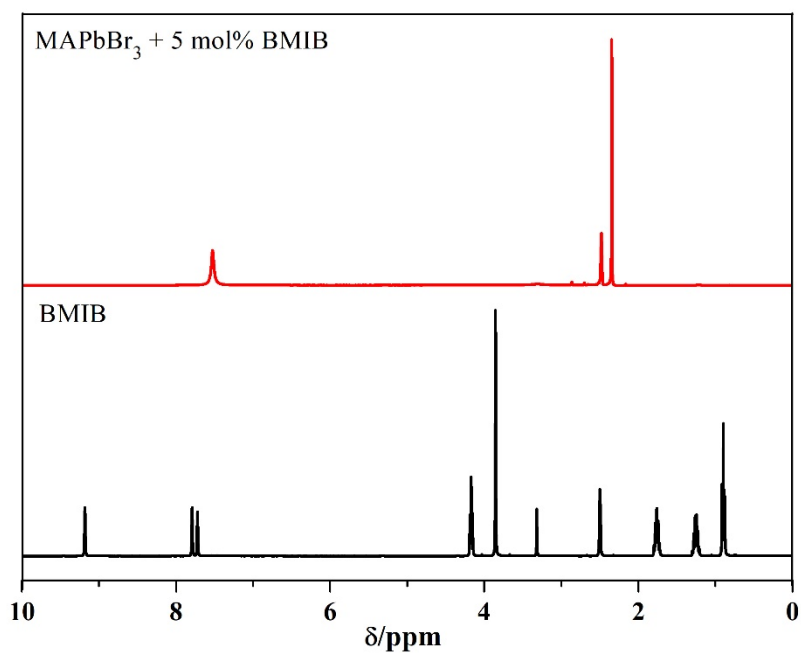

**Figure S6.**  $^1\text{H}$  NMR spectrum of BMIB and MAPbBr<sub>3</sub> crystals with 5 mol% of BMIB measured in DMSO-d<sub>6</sub> solution.

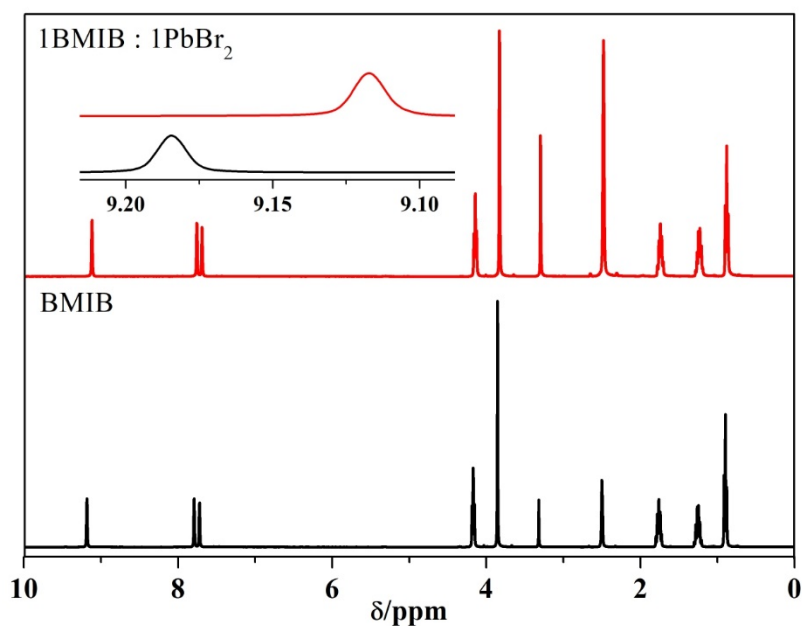

**Figure S7.**  $^1\text{H}$  NMR spectrum of BMIB and mixture of BMIB : PbBr<sub>2</sub> (1:1) in DMSO-d<sub>6</sub> solution.

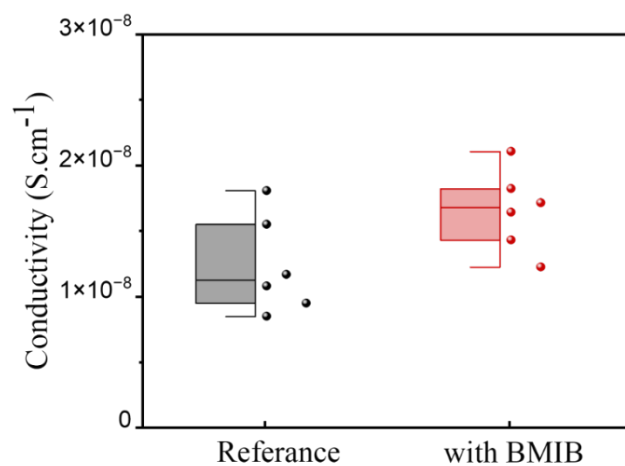

**Figure S8.** Conductivity of the reference and BMIB-based MAPbBr<sub>3</sub> SCs.

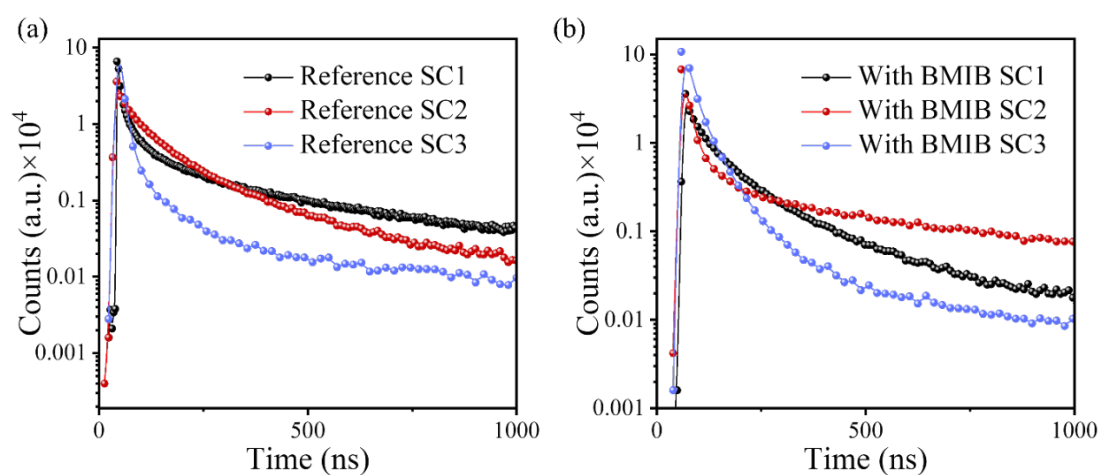

**Figure S9.** (a) Time-resolved photoluminescence (TRPL) of the three different reference and BMIB-based MAPbBr<sub>3</sub> SCs.

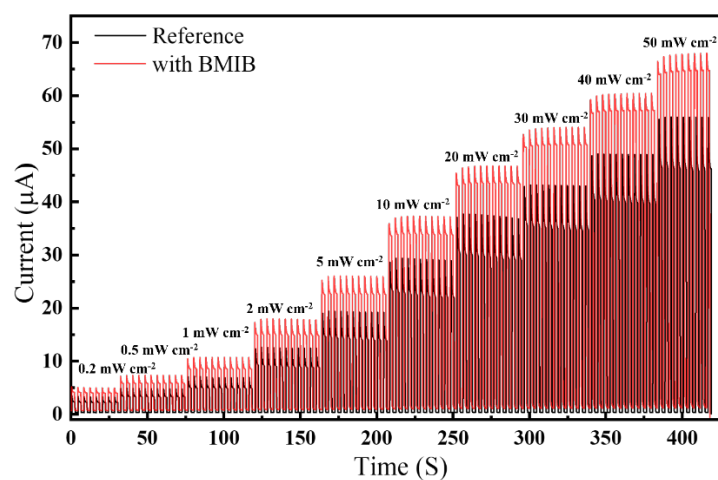

**Figure S10.** Intensity-dependent transient photoresponse of the reference MAPbBr<sub>3</sub> SC-based PD and BMIB-based PD under light pulse.

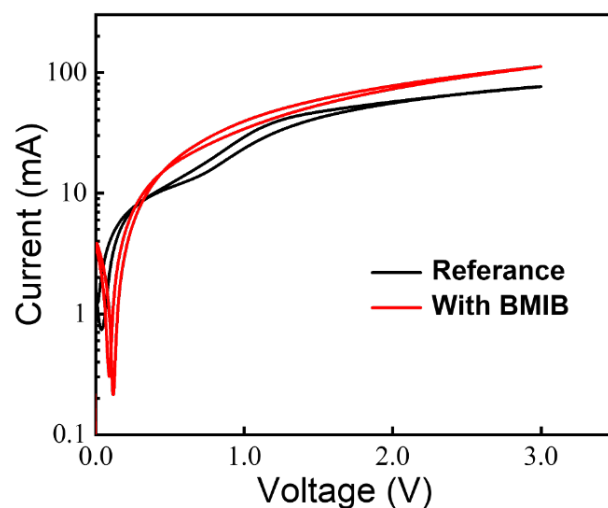

**Figure S11.**  $I$ - $V$  characteristics at  $50 \text{ W cm}^{-2}$  in forward and reverse scan directions for both the MAPbBr<sub>3</sub> SC-based PD. Scan rate:  $100 \text{ mV s}^{-1}$ .

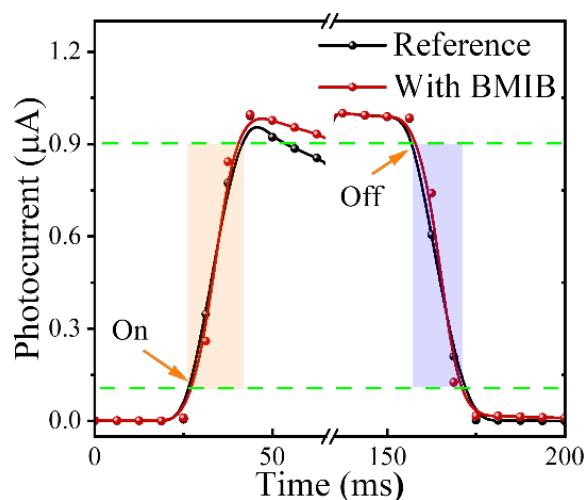

**Figure S12.** Response speed of the reference and BMIB-based PDs at  $1 \text{ mW cm}^{-2}$  irradiance power of green light (530 nm) at 2 V.

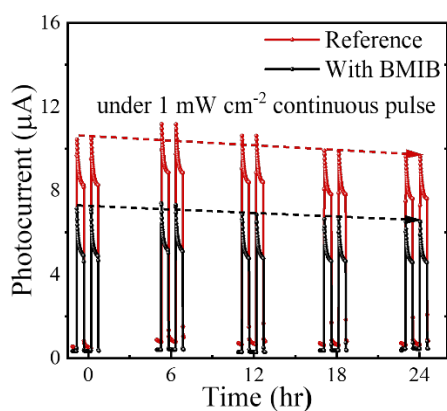

**Figure S13.** Functional stability of the reference and BMIB-based PDs under  $1 \text{ mW cm}^{-2}$  irradiance power of green light (530 nm) at 2 V.

**Table S1.** Comparison of nucleation time and growth time of MAPbBr<sub>3</sub> SCs.

| Methods             | Temperature | Nucleation time | SCs / growth time |
|---------------------|-------------|-----------------|-------------------|
| without (reference) | 60 °C       | N/A             | NA / 12 h         |
|                     | 80 °C       | 30 min          | Large SCs / 4h    |
| with BMIB 1 mol%    | 60 °C       | 5 h             | Small SCs / 24 h  |
| with BMIB 3 mol%    | 60 °C       | 4 h             | Small SCs / 24 h  |
| with BMIB 5 mol%    | 60 °C       | 90 min          | Large SCs / 12h   |
| with BMIB 10 mol%   | 60 °C       | N/A             | NA / 12 h         |

**Table S2.** Average growth rate of MAPbBr<sub>3</sub> SCs.

| Methods             | Temperature | Nucleation time | Collected SCs weight after 6h growth time | Average growth rate |
|---------------------|-------------|-----------------|-------------------------------------------|---------------------|
| without (reference) | 80 °C       | 30 min          | 397                                       | 1.1 mg / min        |
| with BMIB 5%        |             | 60 min          | 286 mg                                    | 0.8 mg / min        |

**Table S3.** Calculated lattice strain of reference and (b) BMIB-based MAPbBr<sub>3</sub> SCs.

| peak position 2θ (deg) | FWHM (deg)          |                  | lattice strain (%)  |                  |
|------------------------|---------------------|------------------|---------------------|------------------|
|                        | without (reference) | with BMIB 5 mol% | without (reference) | with BMIB 5 mol% |
| 14.98                  | 0.30                | 0.19             | 0.996               | 0.631            |
| 30.22                  | 0.29                | 0.23             | 0.469               | 0.372            |
| 45.99                  | 0.41                | 0.24             | 0.422               | 0.247            |

**Table S4.** The comparison of the performance parameters for pure MAPbBr<sub>3</sub> SC based PDs growth by ITC and our work.

| Device                     | Growth temp. (°C) | Seeded /Additive | Duration | Wavelength (nm) / Bias (V) | R (AW <sup>-1</sup> ) | D* Jones                | EQE (%) /Gain | On/off time        | Ref |
|----------------------------|-------------------|------------------|----------|----------------------------|-----------------------|-------------------------|---------------|--------------------|-----|
| Pt/MAPbBr <sub>3</sub> /Pt | 80                | -                | 4h       | 448 nm<br>2 V              | 1.99                  | 5.09 × 10 <sup>12</sup> | 553           |                    | 1   |
| Cr/MAPbBr <sub>3</sub> /Au | 60                | -                | 20 days  | 515 nm<br>5 V              | 55.7                  | 8 × 10 <sup>13</sup>    | 13453         | 120 ms /<br>86 ms  | 2   |
| Pt/MAPbBr <sub>3</sub> /Pt | 110               | -                | -        | White light<br>2V          | 0.059                 | -                       | -             | <20 ns /<br>500 μs | 3   |

|                                |    |            |      |                  |                |                            |                |                            |                  |
|--------------------------------|----|------------|------|------------------|----------------|----------------------------|----------------|----------------------------|------------------|
| Au/MAPbBr <sub>3</sub> /Au     | 80 | -          | -    | 350 nm           | -              | -                          | 900            | -/ 30<br>μs                | 4                |
| Au/MAPbBr <sub>3</sub> /Au     | 85 | seeded     | -    | 405 nm<br>9.84 V | 0.038<br>(110) | -                          | 0.113<br>(110) | 0.153<br>s /<br>0.057<br>s | 5                |
| Au/MAPbBr <sub>3</sub> /Au     | 80 | -          | -    | 576 nm<br>2 V    | 5.3            | 7.4 ×<br>10 <sup>11</sup>  | 1130           | 3.90<br>ms /<br>4.09<br>ms | 6                |
| C/MAPbBr <sub>3</sub> /<br>C   | 65 | Seeded     | 6 h  | 473 nm<br>5 V    | 5.49           | 5.35<br>× 10 <sup>11</sup> |                |                            | 7                |
| Pt/MAPbBr <sub>3</sub> /<br>Pt | 80 | -          | 4 h  | 530 nm<br>2V     | 3.5            | 7.8 ×<br>10 <sup>12</sup>  | 839            | 14.3<br>ms /<br>16.1<br>ms | This<br>wor<br>k |
|                                | 60 | BMIB<br>IL | 12 h | 530 nm<br>2V     | 4.81           | 9.35<br>× 10 <sup>12</sup> | 1124           | 12.1<br>ms /<br>14.8<br>ms |                  |

**Supplementary Note 1.** The lattice strain from XRD was calculated by using the HighScore analysis software from PANanalytical. The lattice strain (%) is calculated by the tangent formula:

$$lattice\ strain = \frac{B_{struct}}{4 \tan \theta} \quad (S1)$$

where,  $B_{struct}$  describes the structural broadening by:

$$B_{struct} = \sqrt{B_{obs}^2 - B_{std}^2} \quad (S2)$$

where,  $B_{obs}$  and  $B_{std}$  are breadth obtained from the sample to be analyzed and breadth obtained from the standard sample, respectively.<sup>8</sup>

**Supplementary Note 2.**

Responsivity (R), Specific Detectivity (D\*) and External Quantum Efficiency (EQE) are important parameters for a PD. The photoresponse (R) of the PD, was calculated using the formula:<sup>1</sup>



$$R = (J_{ph} - J_d)/P \quad (S3)$$

where the  $J_{ph}$  is the photocurrent density,  $J_d$  is the dark current density, and  $P$  is the illumination power. The  $D^*$  of the PD, was calculated by the equation; <sup>1</sup>

$$D^* = R/\sqrt{(2qJ_d)} \quad (S4)$$

where,  $q$  is the charge of electron.

The EQE of the PDs were calculated by; <sup>1</sup>

$$EQE = Rhc/e\lambda \quad (S5)$$

The Rise time are calculated from time taken to reach 10% to 90% of the photocurrent value after switch on light and fall-time are calculated from time taken to decay 90% to 10% of the photocurrent value after switch off light of a PDs (extracted from the normalized photocurrents).<sup>9</sup>

## References

- (1) Mahapatra, A.; Anilkumar, V.; Chavan, R. D.; Yadav, P.; Prochowicz, D. Understanding the Origin of Light Intensity and Temperature Dependence of Photodetection Properties in a MAPbBr<sub>3</sub> Single-Crystal-Based Photoconductor. *ACS Photonics* **2023**, *10*, 1424–1433.
- (2) Liu, Y.; Zhang, Y.; Yang, Z.; Feng, J.; Xu, Z.; Li, Q.; Hu, M.; Ye, H.; Zhang, X.; Liu, M.; Zhao, K.; Liu, S. Low-Temperature-Gradient Crystallization for Multi-Inch High-Quality Perovskite Single Crystals for Record Performance Photodetectors. *Mater. Today* **2019**, *22*, 67–75.
- (3) Cho, Y.; Jung, H. R.; Kim, Y. S.; Kim, Y.; Park, J.; Yoon, S.; Lee, Y.; Cheon, M.; Jeong, S. Y.; Jo, W. High Speed Growth of MAPbBr<sub>3</sub> Single Crystals via Low-Temperature Inverting Solubility: Enhancement of Mobility and Trap Density for Photodetector Applications. *Nanoscale* **2021**, *13*, 8275–8282.
- (4) Wang, X.; Huang, Y.; Lei, W.; Li, Q.; Zhang, X.; Khan, Q.; Wang, B.; Wang, X.; Huang, Y.; Lei, W.; Li, Q.; Zhang, X.; Khan, Q.; Wang, B. Asymmetrical Photodetection Response of Methylammonium Lead Bromide Perovskite Single Crystal. *Cryst. Res. Technol.* **2017**, *52*, 1700115.

- (5) Zuo, Z.; Ding, J.; Zhao, Y.; Du, S.; Li, Y.; Zhan, X.; Cui, H. Enhanced Optoelectronic Performance on the (110) Lattice Plane of an MAPbBr<sub>3</sub> Single Crystal. *J. Phys. Chem. Lett.* **2017**, *8*, 684–689.
- (6) Gavranovic, S.; Pospisil, J.; Zmeskal, O.; Novak, V.; Vanysek, P.; Castkova, K.; Cihlar, J.; Weiter, M. Electrode Spacing as a Determinant of the Output Performance of Planar-Type Photodetectors Based on Methylammonium Lead Bromide Perovskite Single Crystals. *ACS Appl. Mater. Interfaces* **2022**, *14*, 20159–20167.
- (7) Zia, W.; Aranda, C. A.; Pospisil, J.; Kovalenko, A.; Rai, M.; Momblona, C.; Gorji, S.; Muñoz-Matutano, G.; Saliba, M. Impact of Low-Temperature Seed-Assisted Growth on the Structural and Optoelectronic Properties of MAPbBr<sub>3</sub> Single Crystals. *Chem. Mater.* **2023**, *35*, 5458–5467.
- (8) Amari, S.; Verilhac, J. M.; Gros D'Aillon, E.; Ibanez, A.; Zaccaro, J. Optimization of the Growth Conditions for High Quality CH<sub>3</sub>NH<sub>3</sub>PbBr<sub>3</sub> Hybrid Perovskite Single Crystals. *Cryst. Growth Des.* **2020**, *20*, 1665–1672.
- (9) Mahapatra, A.; Prochowicz, D.; Kruszyńska, J.; Satapathi, S.; Akin, S.; Kumari, H.; Kumar, P.; Fazel, Z.; Tavakoli, M. M.; Yadav, P. Effect of Bromine Doping on the Charge Transfer, Ion Migration and Stability of the Single Crystalline MAPb(Br<sub>x</sub>I<sub>1-x</sub>)<sub>3</sub> Photodetector. *J. Mater. Chem. C* **2021**, *9*, 15189–15200.
